# Supplementary material for: Initial Coulombic efficiency improvement of the Li1.2Mn0.567Ni0.166Co0.067O2 lithium-rich material by ruthenium substitution for manganese
Source: Royal Society of Chemistry journal article supplement (doi:10.1039/c2jm33484d), 2012-01-01
Supplement: c2jm33484d.pdf [file c2jm33484d.pdf]

Electronic Supplementary Information for

**Initial coulombic efficiency improvement of the  $\text{Li}_{1.2}\text{Mn}_{0.567}\text{Ni}_{0.166}\text{Co}_{0.067}\text{O}_2$**

**lithium-rich material by ruthenium substitution for manganese**

Haijun Yu and Haoshen Zhou

Contents:

1. Experimental

1.1 Materials synthesis

1.2 Characterization

1.3 Electrochemical test

2. Electrochemical impedance spectroscopies (EIS) of the cell with  $\text{Li}_{1.2}\text{Mn}_{0.567-x}\text{Ru}_x\text{Ni}_{0.166}\text{Co}_{0.067}\text{O}_2$  ( $x = 0.00, 0.03, 0.05$  and  $0.07$ ) electrode materials.

3. DQ/dV curves associating with the  $\text{Li}_2\text{MnO}_3$  component activation process.

## 1. Experimental

### 1.1 Materials synthesis

The lithium-rich layered materials used in this communication were prepared by the solid state reaction technology. In a typical synthesis, firstly, required amounts of the transition metal acetates  $\text{Mn}(\text{CH}_3\text{COO})_2 \cdot 4\text{H}_2\text{O}$  (Wako),  $\text{Ni}(\text{CH}_3\text{COO})_2 \cdot 4\text{H}_2\text{O}$  (Wako),  $\text{Co}(\text{CH}_3\text{COO})_2 \cdot 4\text{H}_2\text{O}$  (Wako) and  $\text{RuO}_2$  (Wako) were mixed thoroughly. Secondly, the stoichiometric  $\text{LiOH} \cdot \text{H}_2\text{O}$  (Wako) (5% excess) were mixed with the transition metal mixture together, then calcined in the furnace at  $500\text{ }^\circ\text{C}$  for 5 h, and then the powder were pressed into pellets and calcined in the furnace at  $900\text{ }^\circ\text{C}$  for 15 h. Finally, these lithium-rich layered materials of  $\text{Li}_{1.2}\text{Mn}_{0.567-x}\text{Ru}_x\text{Ni}_{0.166}\text{Co}_{0.067}\text{O}_2$  ( $x = 0, 0.03, 0.05$  and  $0.07$ ) were prepared, which were labeled with Ru-0, Ru-0.03, Ru-0.05 and Ru-0.07 respectively.

### 1.2 Characterization

The crystal structures of the pristine powders were obtained by powder X-ray diffraction (XRD) on a Bruker D8 Advance diffractometer using  $\text{Cu K}_\alpha$  radiation. The diffraction data were recorded in the  $2\theta$  range of  $10\text{-}90^\circ$  with a step of  $0.02^\circ$  and a count time of 1s. The morphology and size of prepared powders were also observed using scanning electron microscopy (SEM, TOPCON DS-720 instrument).

### 1.3 Electrochemical test

The charge/discharge tests were carried out using the CR2032 coin-type cells, consisting of a cathode and lithium metal anode separated by a Celgard 2400 porous polypropylene film. The electrolyte is 1M  $\text{LiPF}_6$  in ethylene carbonate/dimethyl

carbonate (EC/DEC, 1:1(v/v)). The cathode slurry were made with a weight to weight ratio of 80% of the synthesized  $\text{Li}_{1.2}\text{Mn}_{0.567-x}\text{Ru}_x\text{Ni}_{0.166}\text{Co}_{0.067}\text{O}_2$  ( $x = 0, 0.03, 0.05$  and  $0.07$ ) electrode materials, 15% of teflonized acetylene black (AB), and 5% of polytetrafluoro ethylene. The electrodes were produced by pressing the slurry onto a 10 micron aluminum mesh current collector and dried at  $80\text{ }^\circ\text{C}$  for 10 h in a vacuum oven. The cells were assembled in a glove box filled with dried argon gas. The cells were charged and discharged in the voltage range of 2.0-4.4 V and 2.0-4.8 V at a constant current density of 5 mA/g at  $25\text{ }^\circ\text{C}$ . The electrochemical impedance spectroscopy (EIS) was performed on the Solartron 1253B Frequency Response Analyzer. The amplitude of the a.c. signal was kept at 5 mV. The frequency range of measurement was 0.6MHz-0.01Hz. Data acquisition and analysis were done respectively using the electrochemical impedance software, ZPlot and Zview.

## 2. Electrochemical impedance spectroscopies (EIS) of the cells with

$\text{Li}_{1.2}\text{Mn}_{0.567-x}\text{Ru}_x\text{Ni}_{0.166}\text{Co}_{0.067}\text{O}_2$  ( $x = 0.00, 0.03, 0.05$  and  $0.07$ ) electrode materials.

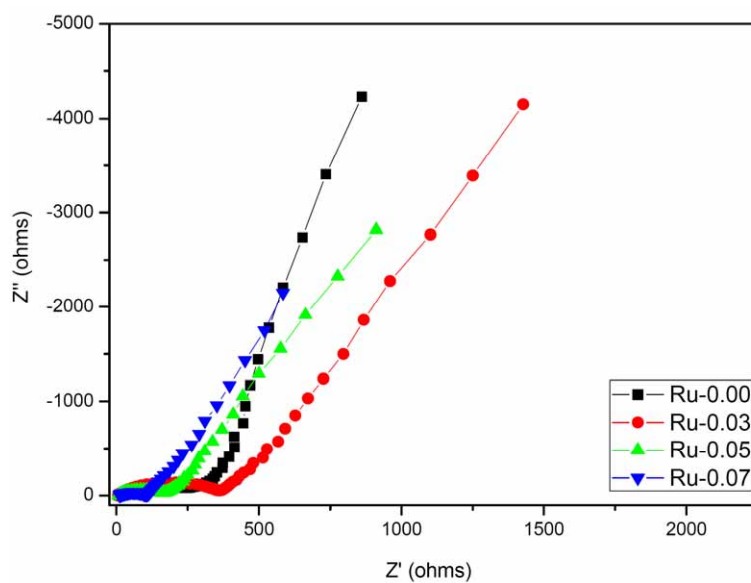

**Fig. S1** Nyquist plots of the cells with  $\text{Li}_{1.2}\text{Mn}_{0.567-x}\text{Ru}_x\text{Ni}_{0.166}\text{Co}_{0.067}\text{O}_2$  ( $x = 0.00, 0.03, 0.05$  and  $0.07$ ) lithium-rich layered materials prepared by solid state reaction method

### 3. DQ/dV curves associating with the $\text{Li}_2\text{MnO}_3$ component activation process.

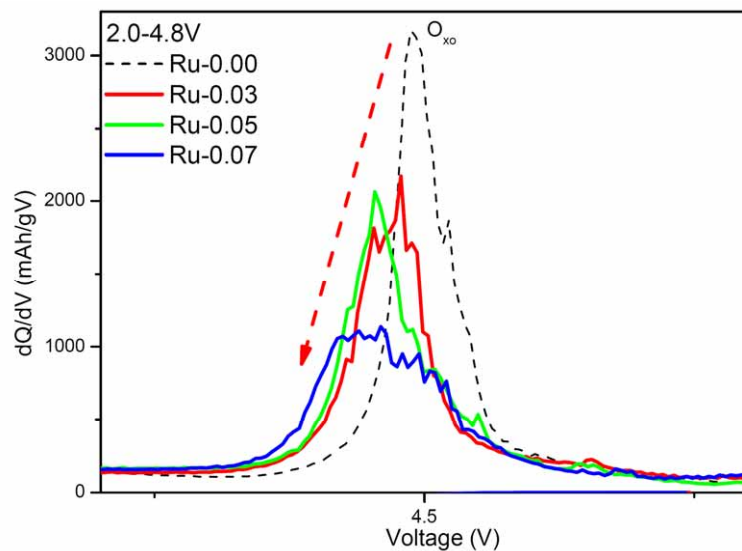

**Fig. S2** Enlarged  $dQ/dV$  curves in Fig. 2(d) associating with the  $\text{Li}_2\text{MnO}_3$  component activation process during the 1<sup>st</sup> cycle of the  $\text{Li}_{1.2}\text{Mn}_{0.567-x}\text{Ru}_x\text{Ni}_{0.166}\text{Co}_{0.067}\text{O}_2$  ( $x = 0.00, 0.03, 0.05$  and  $0.07$ ) lithium-rich layered materials with 4.8V cut-off voltages.
